# Supplementary material
Source: publisher figshare collection journal article supplement (https://acs.figshare.com/ndownloader/files/12004682)
Supplement: Supplementary file 1 [file 12004682]

## **Supplementary Information**

### **Raman spectroscopy to diagnose Alzheimer's disease and dementia with Lewy bodies in blood**

Maria Paraskevaïdi<sup>a,\*</sup>, Camilo L. M. Morais<sup>a</sup>, Diane E. Halliwell<sup>a</sup>, David M. A. Mann<sup>b</sup>, David Allsop<sup>c</sup>, Pierre L. Martin-Hirsch<sup>d</sup> and Francis L. Martin<sup>a,\*</sup>

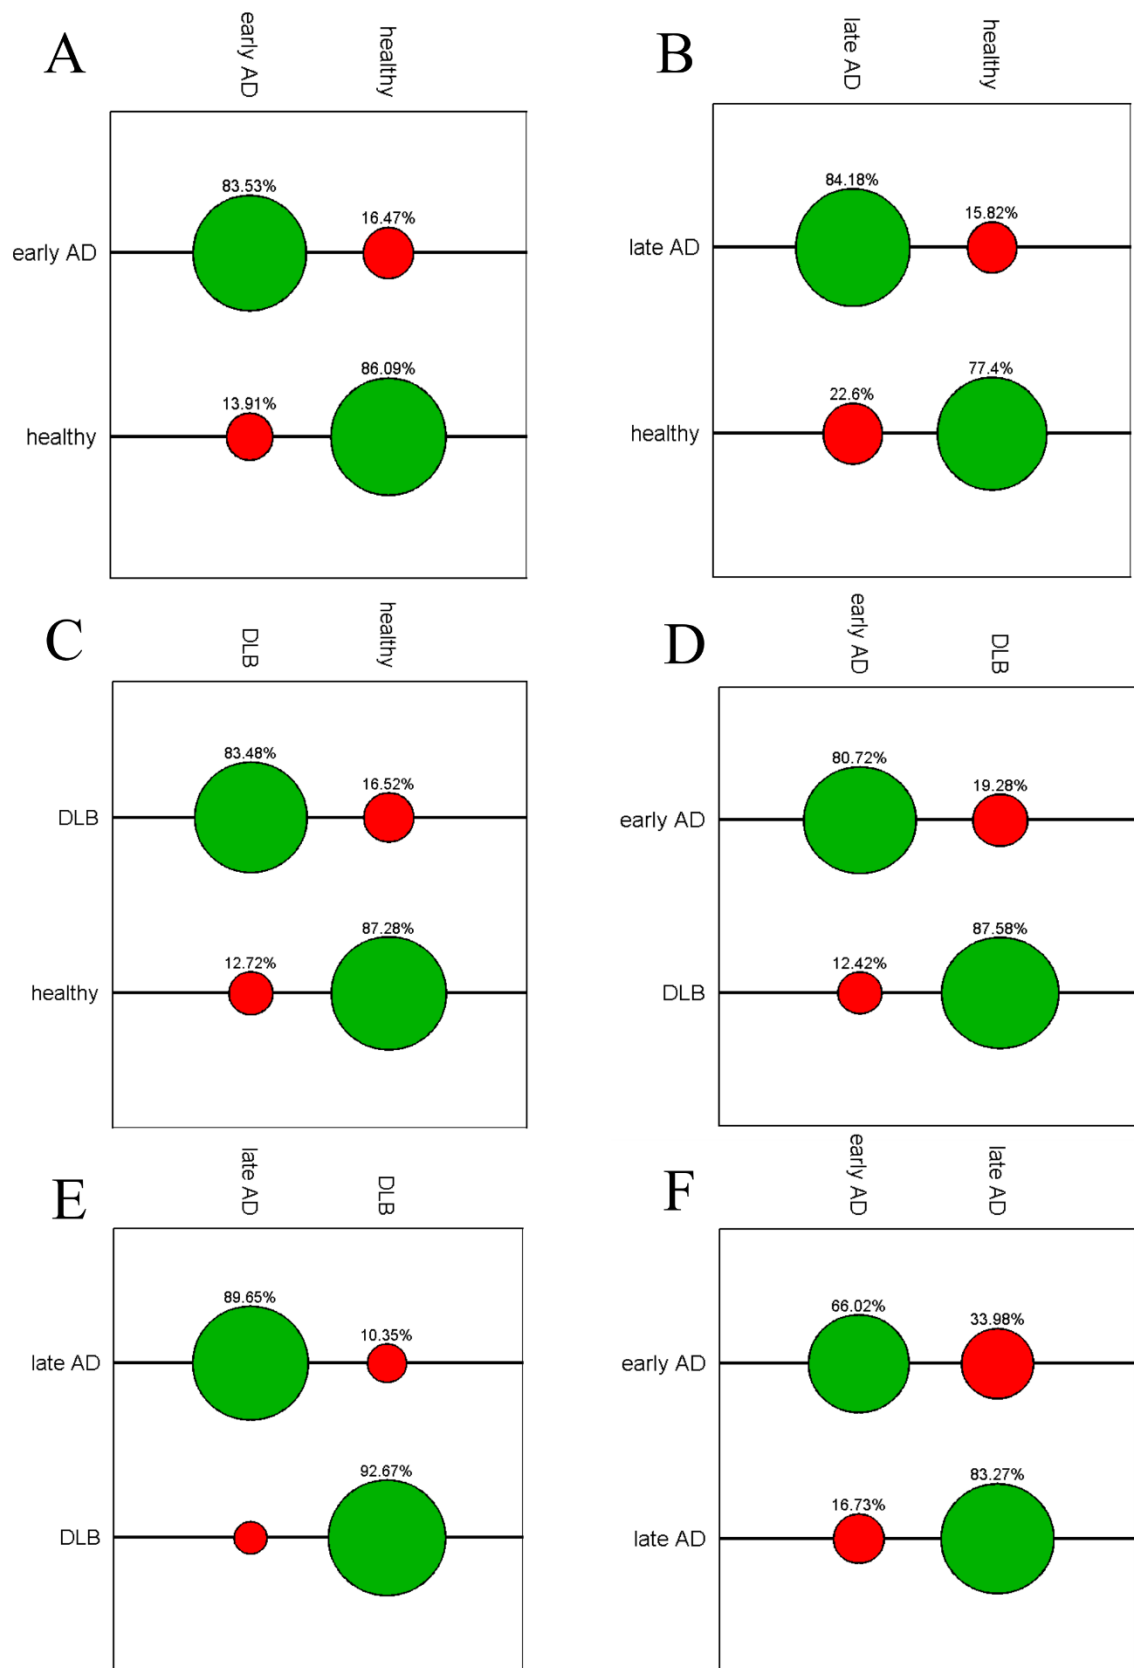

**Supplementary Figure 1. Sensitivity and specificity rates after classification with support vector machine (SVM).** Early-stage Alzheimer's disease (AD) *versus* healthy individuals (A); late-stage AD *versus* healthy individuals (B); dementia with Lewy bodies (DLB) *versus* healthy individuals (C); early-stage AD *versus* DLB (D); late-stage AD *versus* DLB (E); early-stage AD *versus* late-stage AD (F).

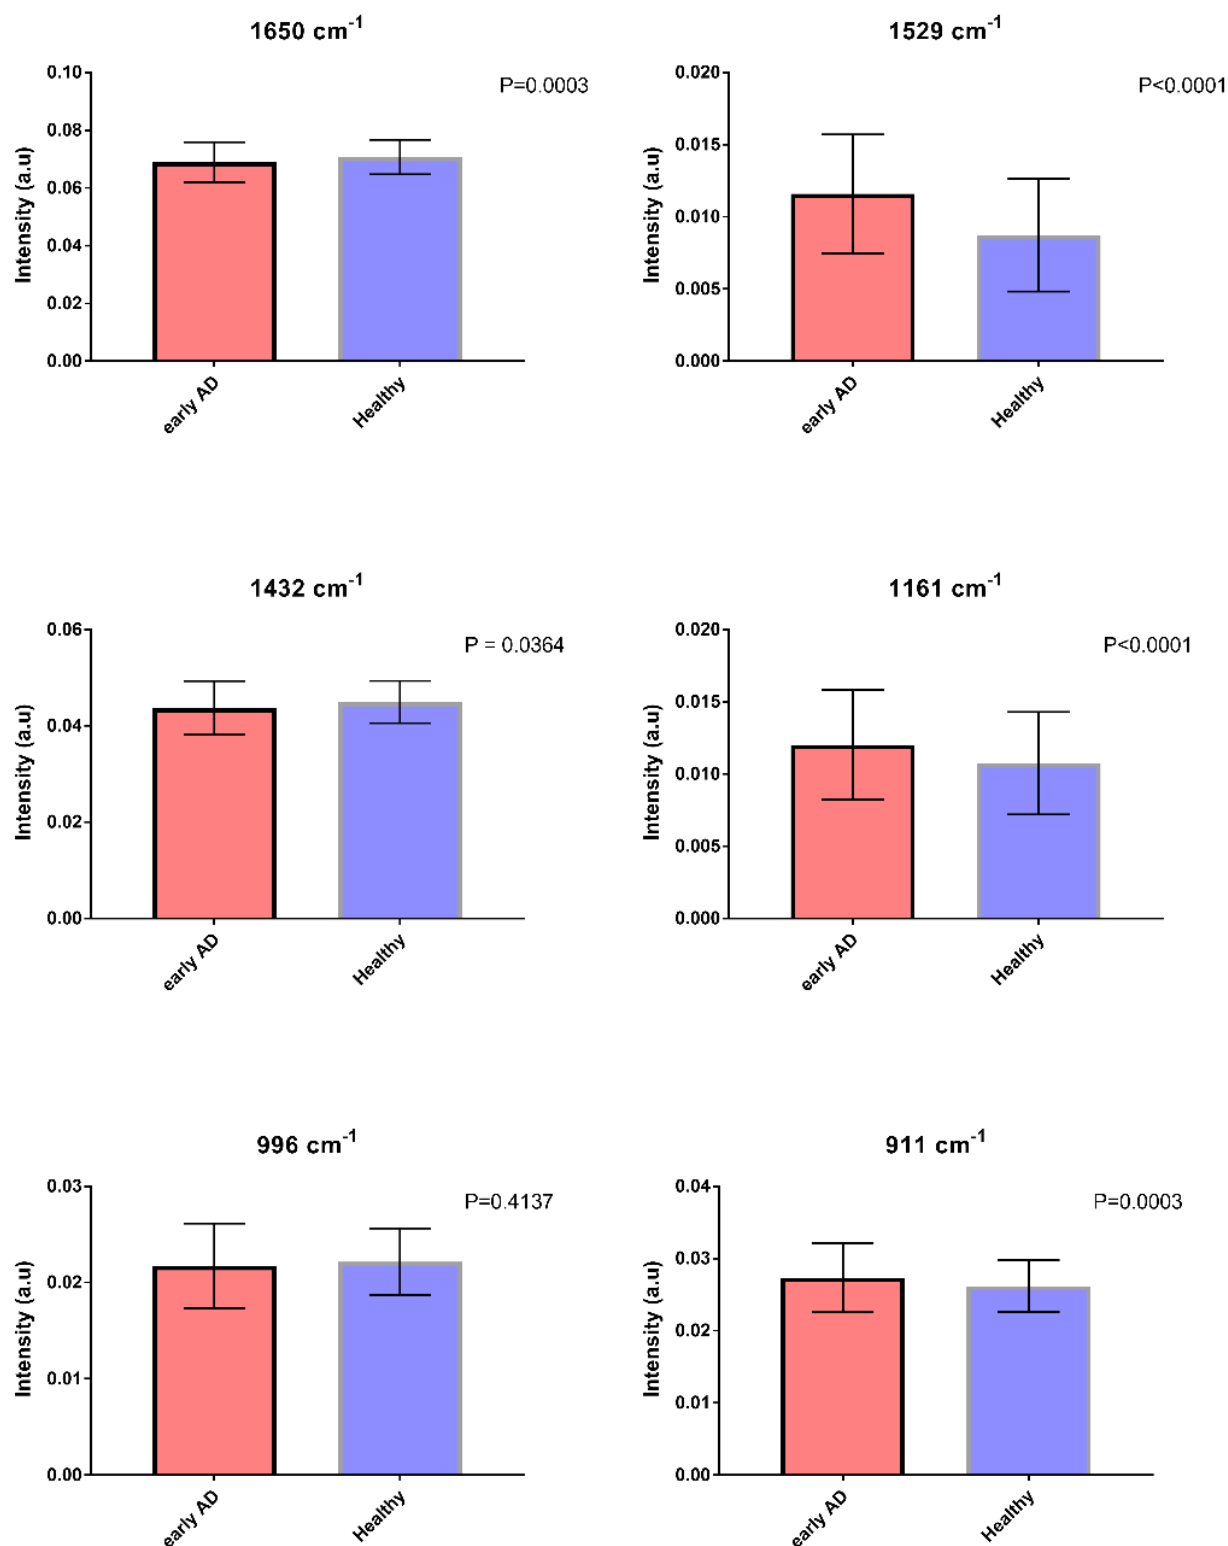

**Supplementary Figure 2. Differences in the intensity levels of important biomolecules after the comparison between early-stage AD and healthy individuals.** Tentative assignments for the above wavenumbers are: 1650  $\text{cm}^{-1}$  (Amide I, proteins), 1529  $\text{cm}^{-1}$  (Amide II, proteins), 1432  $\text{cm}^{-1}$  ( $\text{CH}_2$  vibrations of lipids), 1161  $\text{cm}^{-1}$  (vibrations of quinoid ring), 996  $\text{cm}^{-1}$  (nucleic acid) and 911  $\text{cm}^{-1}$  (glucose) [1, 2]. Data are expressed as the mean  $\pm$  standard deviation (SD) (see Supplementary Table 1).

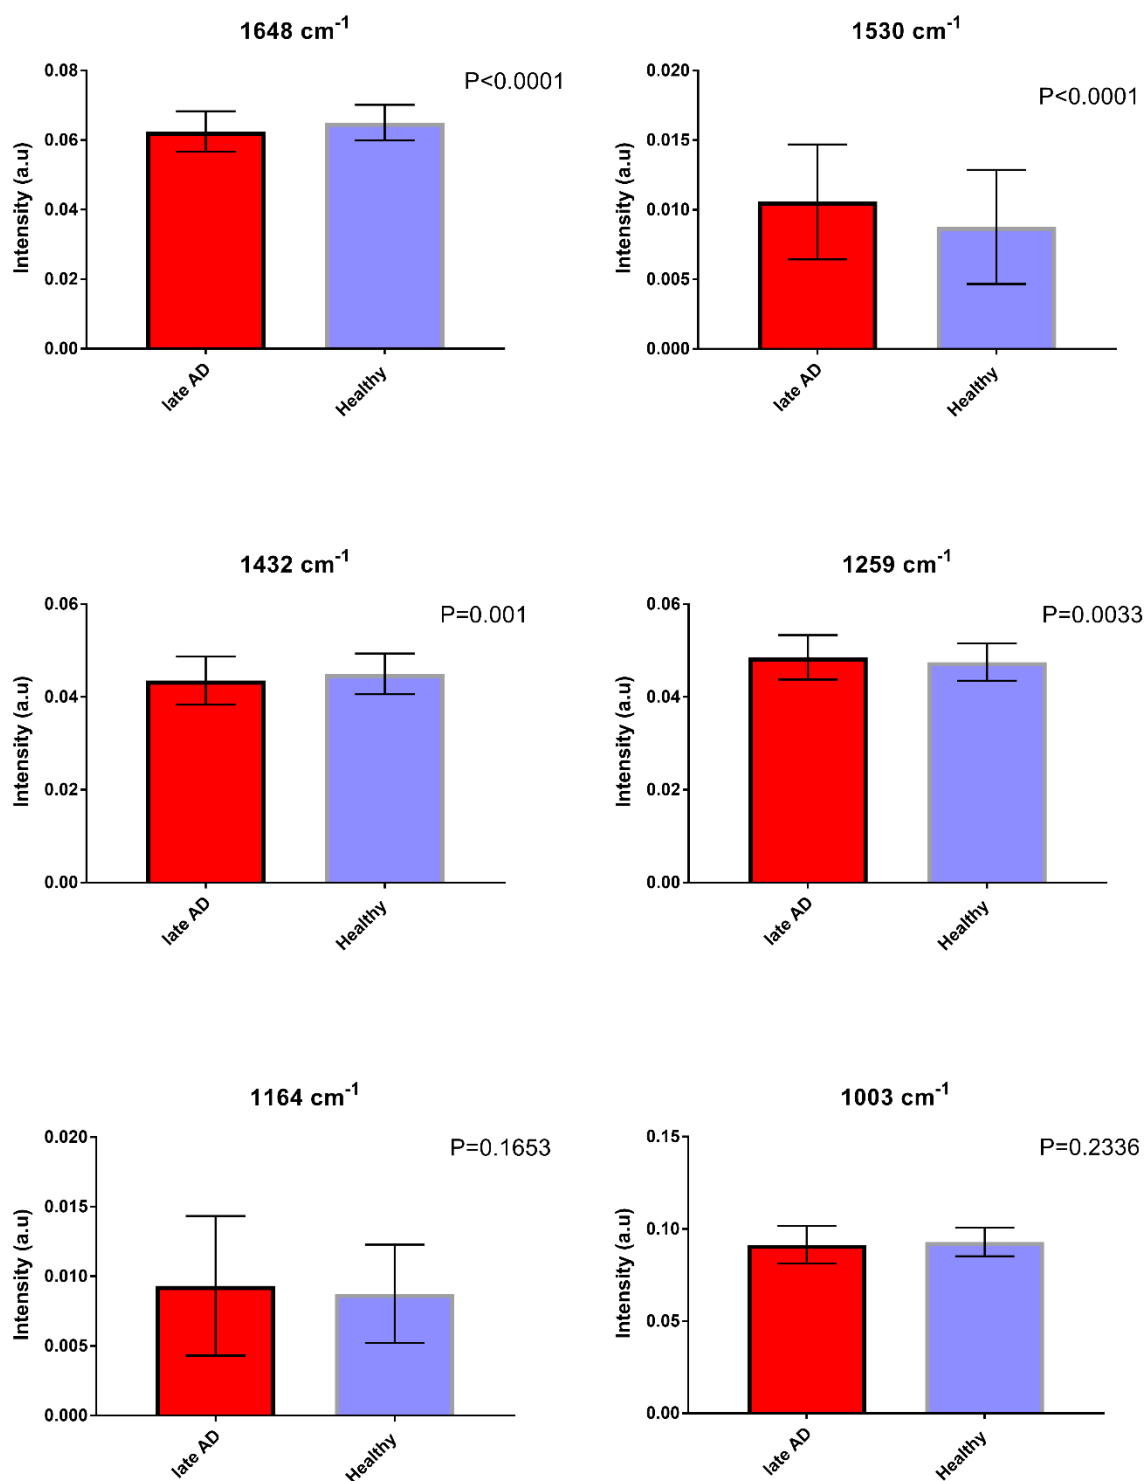

**Supplementary Figure 3. Differences in the intensity levels of important biomolecules after the comparison between late-stage AD and healthy individuals.** Tentative assignments for the above wavenumbers are:  $1648 \text{ cm}^{-1}$  (Amide I, proteins),  $1530 \text{ cm}^{-1}$  (Amide II, proteins),  $1432 \text{ cm}^{-1}$  ( $\text{CH}_2$  vibrations of lipids),  $1259 \text{ cm}^{-1}$  (Amide III, proteins),  $1164 \text{ cm}^{-1}$  (carbohydrates) and  $1003 \text{ cm}^{-1}$  (phenylalanine) [1, 2]. Data are expressed as the mean  $\pm$  standard deviation (SD) (See Supplementary Table 1).

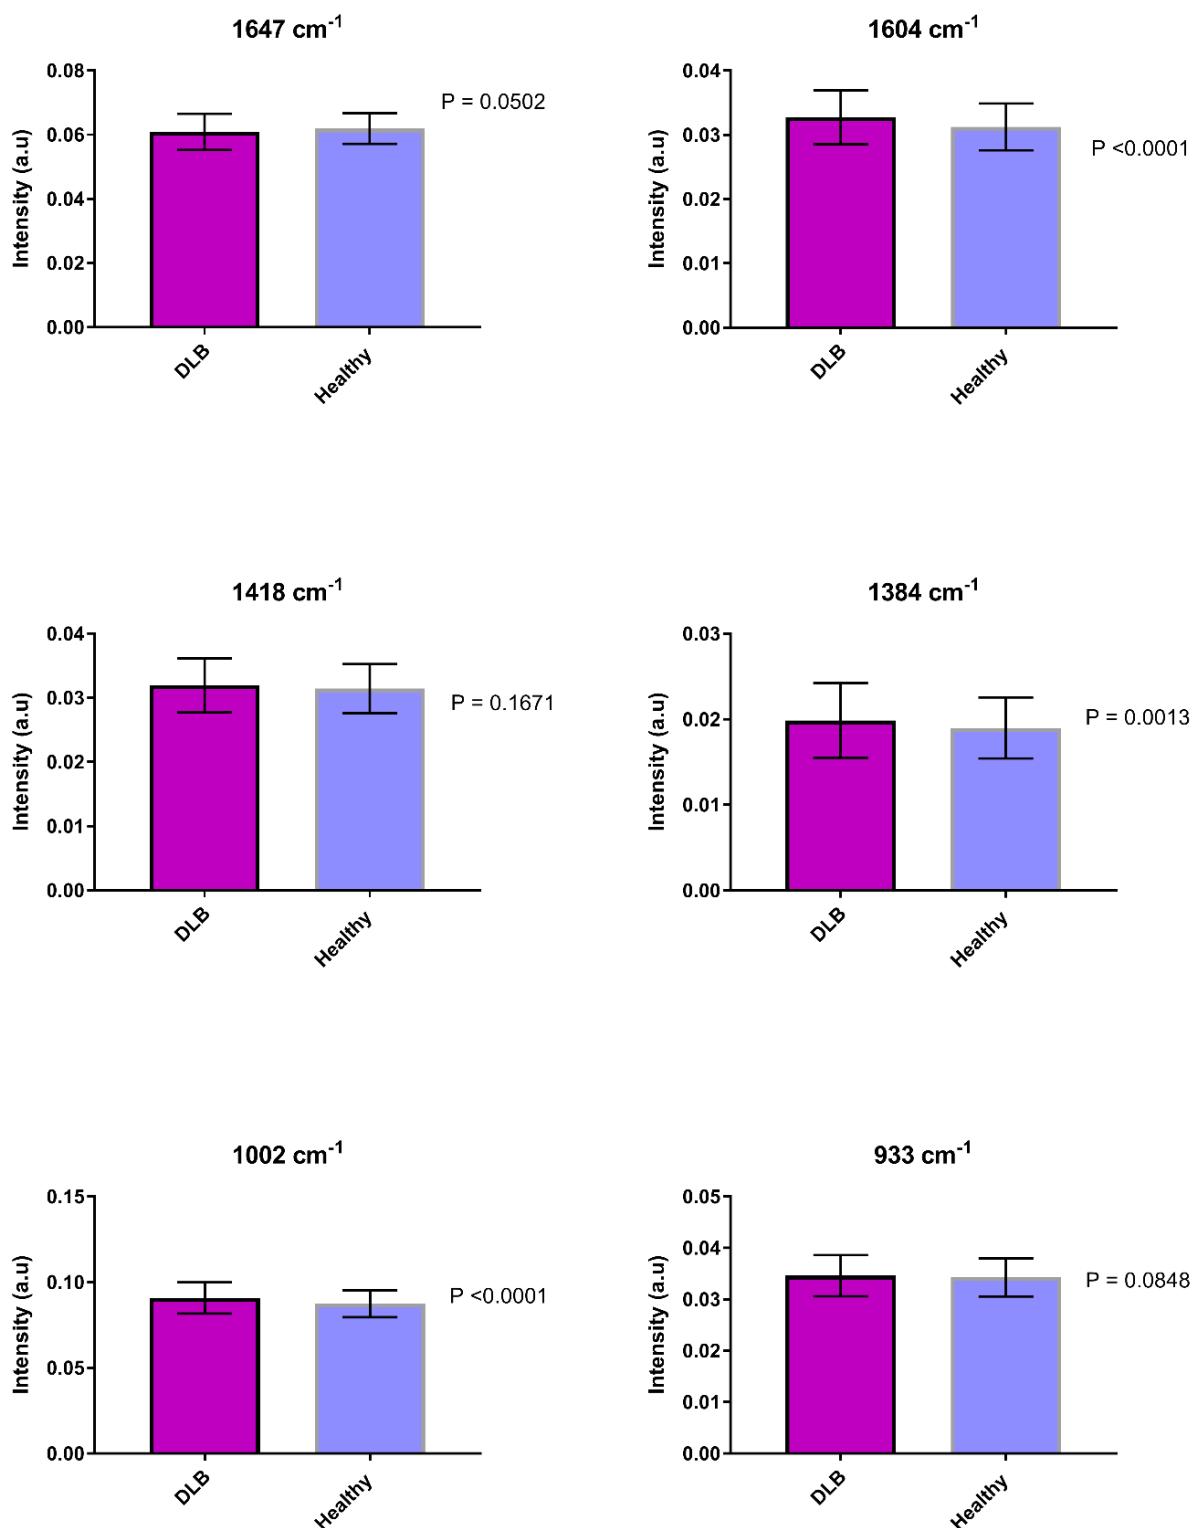

**Supplementary Figure 4. Differences in the intensity levels of important biomolecules after the comparison between DLB and healthy individuals.** Tentative assignments for the above wavenumbers are: 1674  $\text{cm}^{-1}$  (Amide I, proteins), 1604  $\text{cm}^{-1}$  (Amide I, proteins), 1418  $\text{cm}^{-1}$  (C=C stretching of quinoid ring), 1384  $\text{cm}^{-1}$  ( $\text{CH}_3$  vibration of lipids), 1002  $\text{cm}^{-1}$  (phenylalanine), 933  $\text{cm}^{-1}$  (collagen) [1, 2]. Data are expressed as the mean  $\pm$  standard deviation (SD) (See Supplementary Table 1).

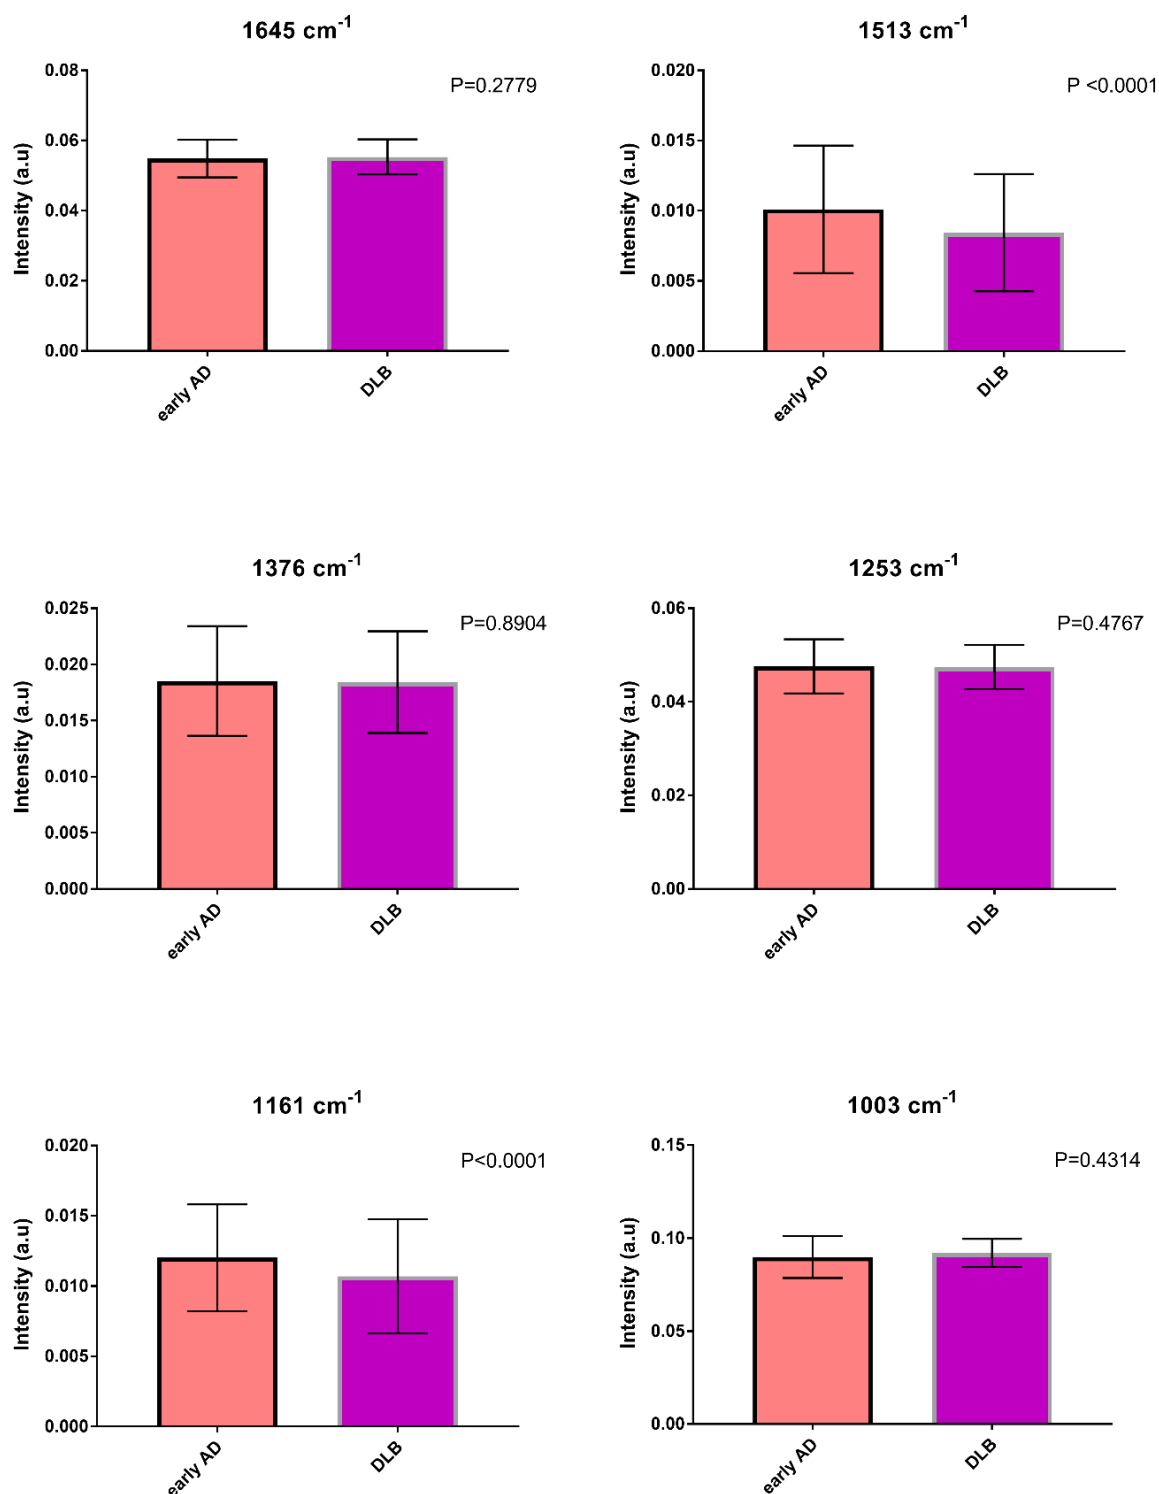

**Supplementary Figure 5. Differences in the intensity levels of important biomolecules after the comparison between early-stage AD and DLB.** Tentative assignments for the above wavenumbers are:  $1645\text{ cm}^{-1}$  (Amide I, proteins),  $1513\text{ cm}^{-1}$  (Amide II, proteins),  $1376\text{ cm}^{-1}$  ( $\text{CH}_3$ , lipids),  $1253\text{ cm}^{-1}$  (Amide III, proteins),  $1161\text{ cm}^{-1}$  (vibrations of quinoid ring) and  $1003\text{ cm}^{-1}$  (phenylalanine) [1, 2]. Data are expressed as the mean  $\pm$  standard deviation (SD) (See Supplementary Table 1).

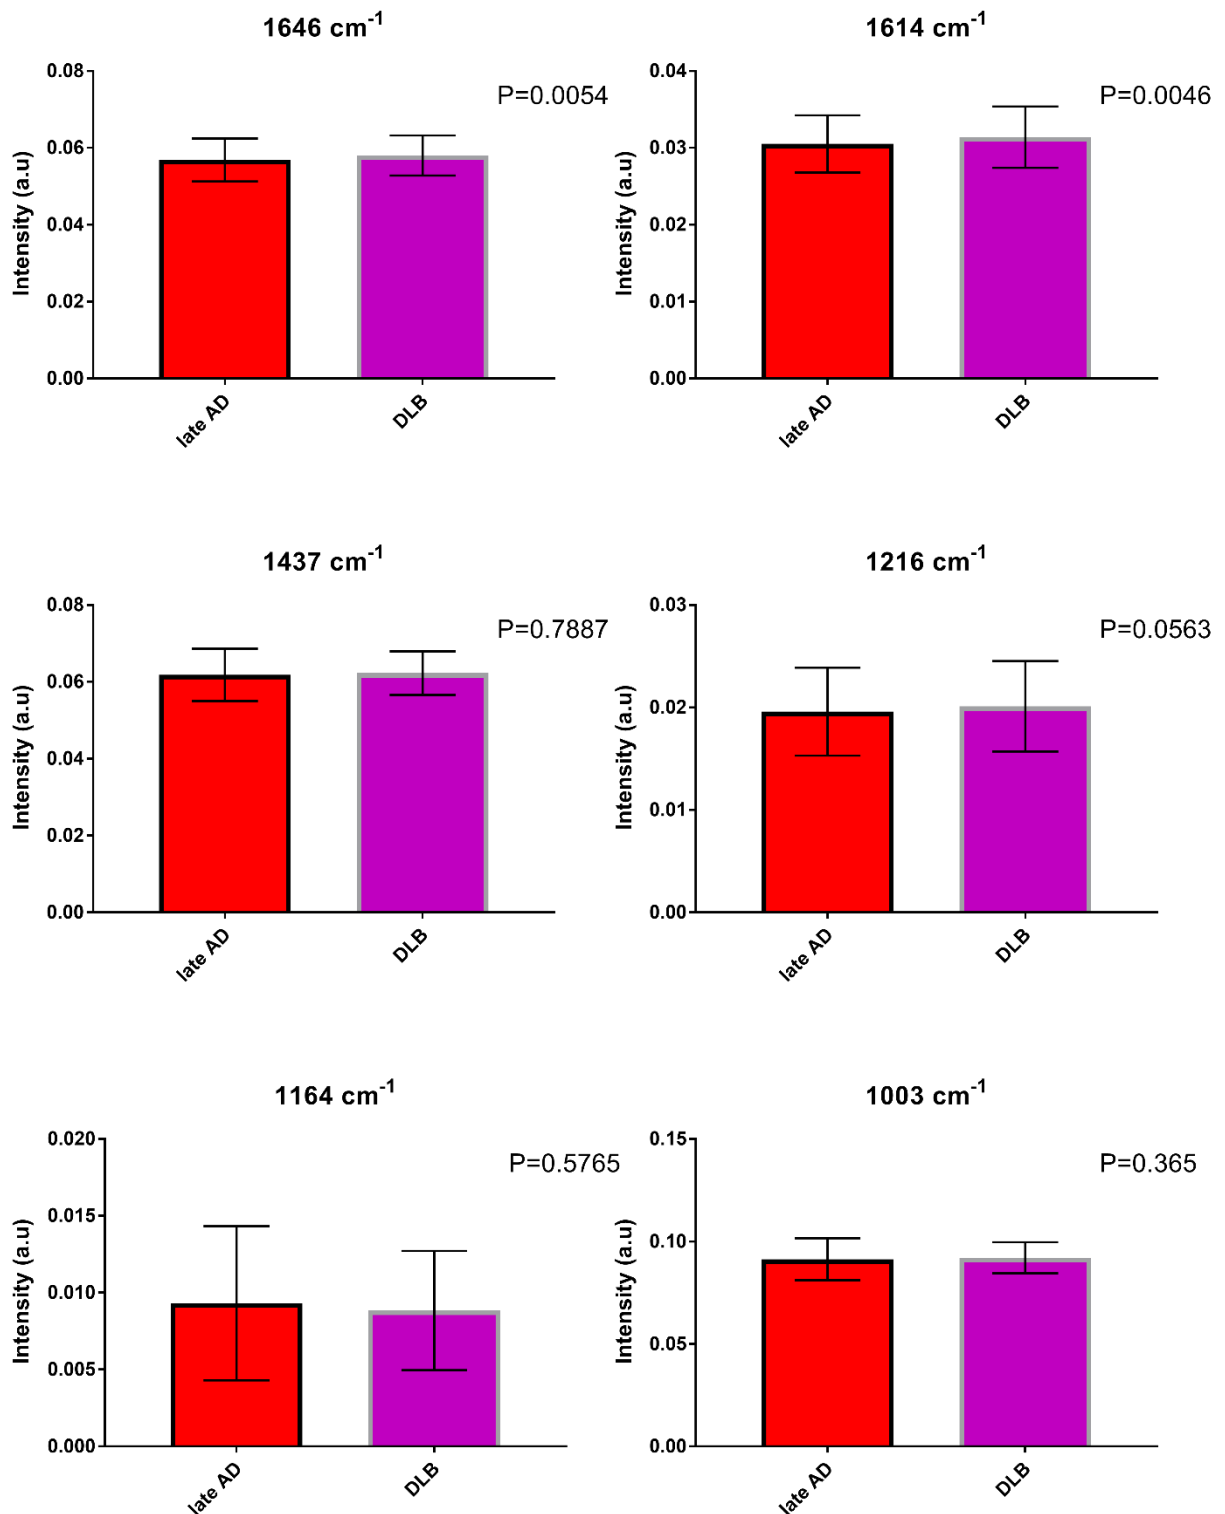

**Supplementary Figure 6. Differences in the intensity levels of important biomolecules after the comparison between late-stage AD and DLB.** Tentative assignments for the above wavenumbers are: 1646  $\text{cm}^{-1}$  (Amide I, proteins), 1614  $\text{cm}^{-1}$  (Amide I, proteins), 1437  $\text{cm}^{-1}$  ( $\text{CH}_2$  vibrations of lipids), 1216  $\text{cm}^{-1}$  (Amide III, proteins), 1164  $\text{cm}^{-1}$  (carbohydrates) and 1003  $\text{cm}^{-1}$  (phenylalanine) [1, 2]. Data are expressed as the mean  $\pm$  standard deviation (SD) (See Supplementary Table 1).

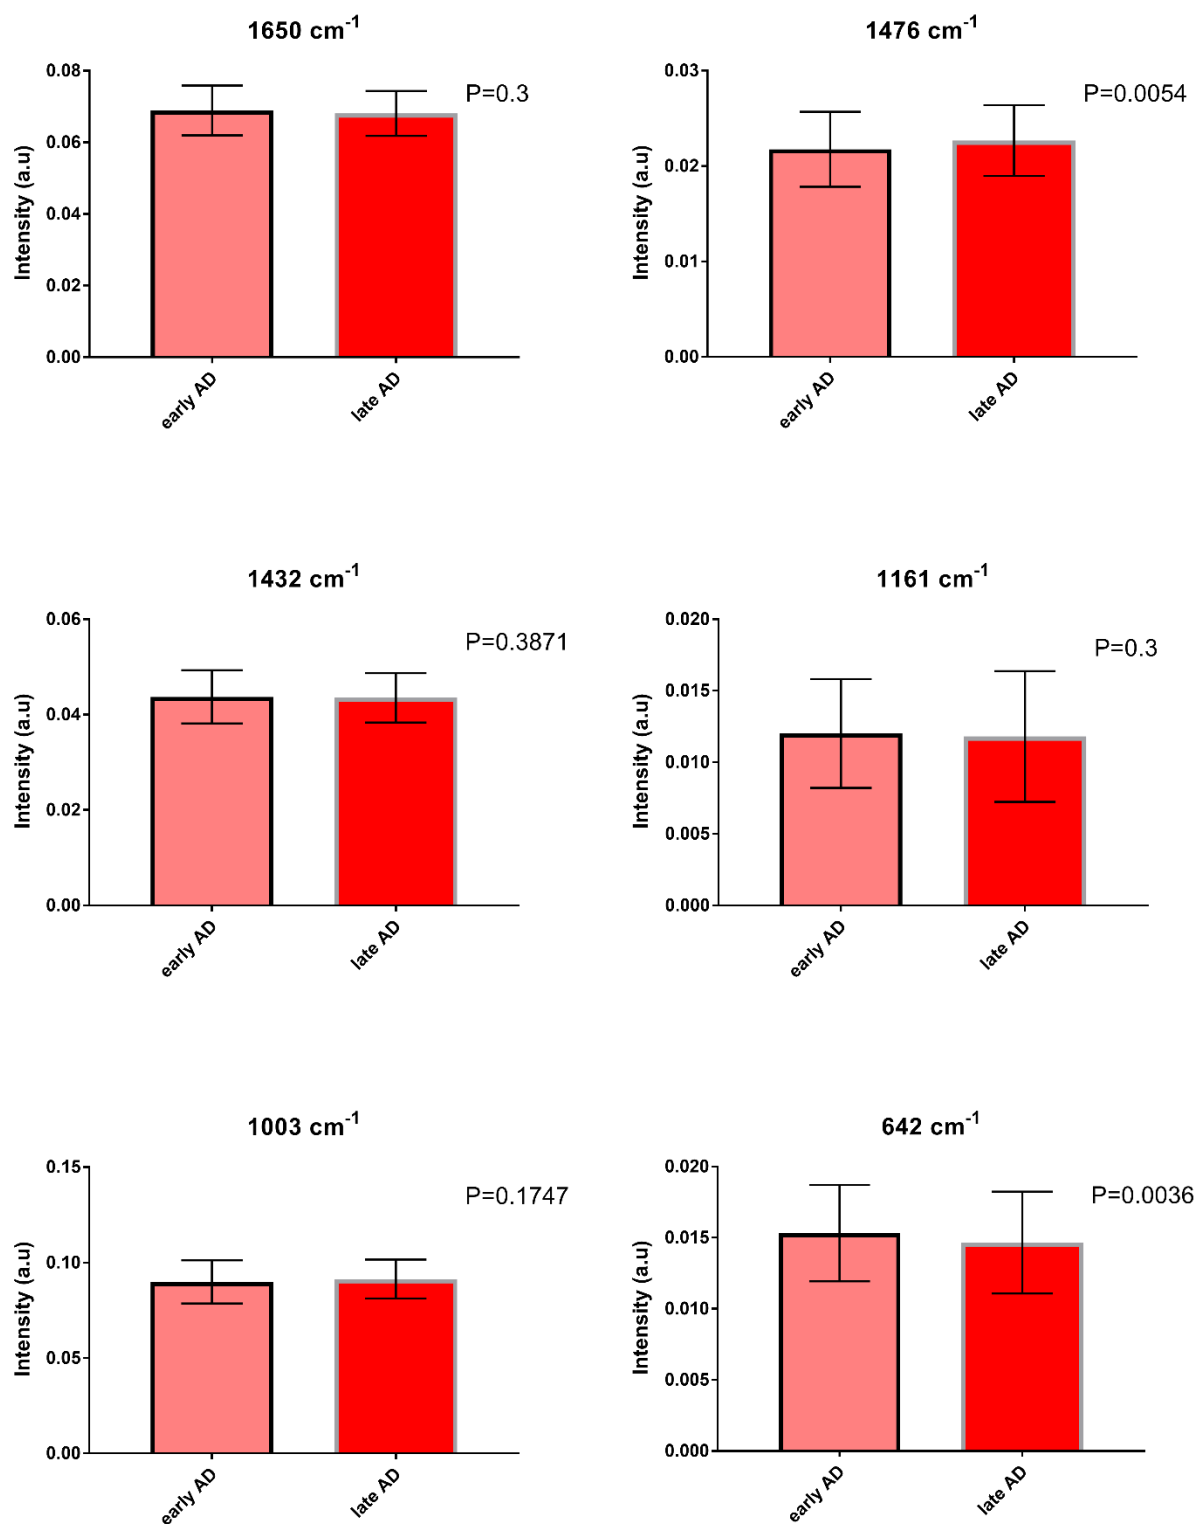

**Supplementary Figure 7. Differences in the intensity levels of important biomolecules after the comparison between early-stage AD and late-stage AD.** Tentative assignments for the above wavenumbers are:  $1650\text{ cm}^{-1}$  (Amide I, proteins),  $1476\text{ cm}^{-1}$  (Amide II, proteins),  $1432\text{ cm}^{-1}$  ( $\text{CH}_3$ , lipids),  $1161\text{ cm}^{-1}$  (vibrations of quinoid ring),  $1003\text{ cm}^{-1}$  (phenylalanine) and  $642\text{ cm}^{-1}$  (C-C and C-S vibrations of proteins) [1, 2]. Data are expressed as the mean  $\pm$  standard deviation (SD) (See Supplementary Table 1).



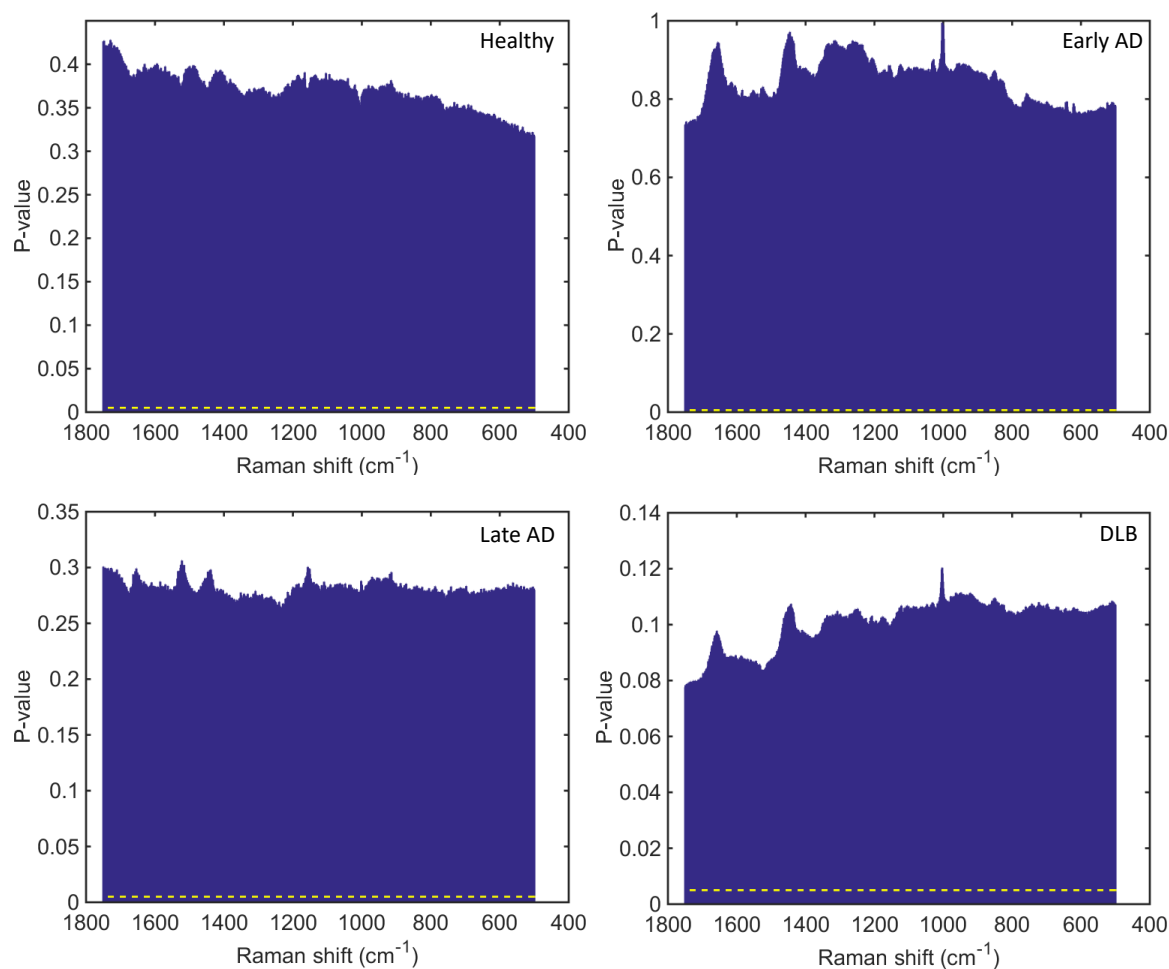

**Supplementary Figure 8. P-values calculated for gender comparison ('Male' versus 'Female') based on their Raman spectra.** Two-tail p-value calculated for each wavenumber in a 95% confidence level, where AD stands for Alzheimer's disease and DLB stands for dementia with Lewy bodies. Dashed yellow line marks the P-value of 0.005.

**Supplementary Table 1.** P-values (two-tail, 95% confidence level) for the different ages in each comparison group.

| <b>Comparison Group</b>    | <b>P-value</b> |
|----------------------------|----------------|
| <b>Early AD vs Healthy</b> | 0.106          |
| <b>Late AD vs Healthy</b>  | 0.004          |
| <b>DLB vs Healthy</b>      | < 0.001        |
| <b>Early AD vs DLB</b>     | 0.026          |
| <b>Late AD vs DLB</b>      | 0.213          |
| <b>Early AD vs Late AD</b> | 0.277          |

AD: Alzheimer's disease; DLB: dementia with Lewy bodies

**Supplementary Table 2.** Mean values, standard deviations (SD), 95% confidence intervals (CI) and P-values after statistical analysis for the different comparison groups.

| Early-stage AD vs HC           |               |               |                    |         |
|--------------------------------|---------------|---------------|--------------------|---------|
| Wavenumber (cm <sup>-1</sup> ) | Early AD      | Healthy       | 95% CI             | P-value |
|                                | Means/SD      |               |                    |         |
| 1650                           | 0.0689/0.0069 | 0.0707/0.0059 | 0.0008 to 0.0028   | 0.0003  |
| 1529                           | 0.0116/0.0041 | 0.0087/0.0039 | -0.0034 to -0.0022 | <0.0001 |
| 1432                           | 0.0437/0.0059 | 0.0449/0.0044 | 0.00004 to 0.0015  | 0.0364  |
| 1161                           | 0.012/0.0038  | 0.0107/0.0035 | -0.0019 to -0.0007 | <0.0001 |
| 996                            | 0.0217/0.0044 | 0.0222/0.0035 | -0.0003 to 0.0008  | 0.4137  |
| 911                            | 0.0273/0.0048 | 0.0262/0.0036 | -0.0018 to -0.0006 | 0.0003  |
| Late-stage AD vs HC            |               |               |                    |         |
| Wavenumber (cm <sup>-1</sup> ) | Late AD       | Healthy       | 95% CI             | P-value |
|                                | Means/SD      |               |                    |         |
| 1648                           | 0.0625/0.0058 | 0.065/0.0051  | 0.0016 to 0.0029   | <0.0001 |
| 1530                           | 0.1057/0.0042 | 0.0087/0.0041 | -0.0024 to -0.0013 | <0.0001 |
| 1432                           | 0.0435/0.0052 | 0.0449/0.0044 | 0.0004 to 0.0016   | 0.001   |
| 1259                           | 0.0485/0.0048 | 0.0475/0.004  | -0.0014 to -0.0003 | 0.0033  |
| 1164                           | 0.0093/0.005  | 0.0087/0.0035 | -0.0009 to 0.0002  | 0.1653  |
| 1003                           | 0.0913/0.0102 | 0.0928/0.0078 | -0.0003 to 0.0014  | 0.2336  |

| <b>DLB vs HC</b>                    |                 |                |                    |                |
|-------------------------------------|-----------------|----------------|--------------------|----------------|
| <b>Wavenumber (cm<sup>-1</sup>)</b> | <b>DLB</b>      | <b>Healthy</b> | <b>95% CI</b>      | <b>P-value</b> |
|                                     | <b>Means/SD</b> |                |                    |                |
| 1647                                | 0.0609/0.0056   | 0.0619/0.0048  | 0 to 0.0014        | 0.0502         |
| 1604                                | 0.0328/0.0042   | 0.0312/0.0036  | -0.0021 to -0.001  | <0.0001        |
| 1418                                | 0.0319/0.0042   | 0.0314/0.0038  | -0.0009 to 0.0002  | 0.1671         |
| 1384                                | 0.0199/0.0043   | 0.0189/0.0036  | -0.0015 to -0.0004 | 0.0013         |
| 1002                                | 0.0908/0.0092   | 0.0874/0.0079  | -0.0043 to -0.0023 | <0.0001        |
| 933                                 | 0.0346/0.004    | 0.0343/0.0037  | -0.001 to 0.0001   | 0.0848         |
| <b>Early-stage AD vs DLB</b>        |                 |                |                    |                |
| <b>Wavenumber (cm<sup>-1</sup>)</b> | <b>Early AD</b> | <b>DLB</b>     | <b>95% CI</b>      | <b>P-value</b> |
|                                     | <b>Means/SD</b> |                |                    |                |
| 1645                                | 0.0549/0.0054   | 0.0553/0.0049  | -0.0003 to 0.0013  | 0.2779         |
| 1513                                | 0.0101/0.0045   | 0.0084/0.0042  | -0.0024 to -0.0011 | <0.0001        |
| 1376                                | 0.0185/0.0049   | 0.0184/0.0045  | -0.0007 to 0.0007  | 0.8904         |
| 1253                                | 0.0476/0.0058   | 0.0474/0.0047  | -0.0005 to 0.001   | 0.4767         |
| 1161                                | 0.012/0.0038    | 0.0107/0.0041  | -0.002 to -0.0008  | <0.0001        |
| 1003                                | 0.0898/0.0113   | 0.0919/0.0075  | -0.0007 to 0.0017  | 0.4314         |

| Late-stage AD vs DLB            |               |               |                    |         |
|---------------------------------|---------------|---------------|--------------------|---------|
| Wavenumber (cm <sup>-1</sup> )  | Late AD       | DLB           | 95% CI             | P-value |
|                                 | Means/SD      |               |                    |         |
| 1646                            | 0.0568/0.0056 | 0.058/0.0052  | 0.0003 to 0.0016   | 0.0054  |
| 1614                            | 0.0305/0.0037 | 0.0314/0.0039 | 0.0002 to 0.0013   | 0.0046  |
| 1437                            | 0.0618/0.0068 | 0.0623/0.0057 | -0.0007 to 0.0009  | 0.7887  |
| 1216                            | 0.0196/0.0043 | 0.0201/0.0044 | -0.0006 to 0.0012  | 0.0563  |
| 1164                            | 0.0093/0.005  | 0.0088/0.0038 | -0.0007 to 0.0004  | 0.5765  |
| 1003                            | 0.0913/0.0102 | 0.0919/0.0076 | -0.0014 to 0.0005  | 0.365   |
| Early-stage AD vs late-stage AD |               |               |                    |         |
| Wavenumber (cm <sup>-1</sup> )  | Early AD      | Late AD       | 95% CI             | P-value |
|                                 | Means/SD      |               |                    |         |
| 1650                            | 0.0689/0.0069 | 0.0681/0.0063 | -0.0015 to 0.0005  | 0.3     |
| 1476                            | 0.0218/0.0039 | 0.0227/0.0037 | 0.0002 to 0.0014   | 0.0054  |
| 1432                            | 0.0437/0.0056 | 0.0435/0.0052 | -0.001 to 0.0004   | 0.3871  |
| 1161                            | 0.012/0.0038  | 0.0118/0.0046 | -0.0009 to 0.0003  | 0.3     |
| 1003                            | 0.0898/0.0113 | 0.0913/0.0102 | -0.0003 to 0.0019  | 0.1747  |
| 642                             | 0.0153/0.0034 | 0.0147/0.0036 | -0.0013 to -0.0003 | 0.0036  |

Abbreviations: AD = Alzheimer's disease; HC = healthy controls; DLB = dementia with Lewy bodies; SD = standard deviation; CI = confidence interval

## References

- [1] Movasaghi Z, Rehman S, Rehman IU. Raman spectroscopy of biological tissues. *Applied Spectroscopy Reviews*. 2007;42:493-541.
- [2] Pichardo-Molina JL, Frausto-Reyes C, Barbosa-García O, Huerta-Franco R, González-Trujillo JL, Ramírez-Alvarado CA, et al. Raman spectroscopy and multivariate analysis of serum samples from breast cancer patients. *Lasers in Medical Science*. 2007;22:229-36.
